# Supplementary material
Source: MDPI journal article supplement (https://www.mdpi.com/2073-4344/8/6/251)

# Supplementary Material: An Efficient Photocatalyst for Fast Reduction of Cr(VI) by Ultra-Trace Silver Enhanced Titania in Aqueous Solution

Shengyan Pu<sup>1,2,\*</sup>, Yaqi Hou<sup>1</sup>, Hongyu Chen<sup>1</sup>, Daili Deng<sup>1</sup>, Zeng Yang<sup>1</sup>, Shengyang Xue<sup>1</sup>, Rongxin Zhu<sup>1</sup>, Zenghui Diao<sup>3</sup> and Wei Chu<sup>2</sup>

<sup>1</sup> State Key Laboratory of Geohazard Prevention and Geoenvironment Protection, Chengdu University of Technology, Chengdu 610059, China; houyaqilove@gmail.com (H.Y.); chenhongyu98@163.com (C.H.); dengdaili.1022@gmail.com (D.H.); yangzeng199529@gmail.com (Y.Z.); shengyangxue@gmail.com (X.S.); rongxinzhu@outlook.com (Z.R.)

<sup>2</sup> Department of Civil and Environment Engineering, The Hong Kong Polytechnic University, Hong Kong, China; wei.chu@polyu.edu.hk

<sup>3</sup> School of Environmental Science and Engineering, Zhongkai University of Agriculture and Engineering, Guangzhou 510225, China; zenghuid86@scsio.ac.cn

\* Corresponding: pushengyan@gmail.com or pushengyan13@cdut.cn; Tel./Fax: +86-(0)-28-8407-3253

Received: 10 May 2018; Accepted: 14 June 2018; Published: date

## 1. Tables

**Table S1** BET data for different silver loadings.

| Ag/TiO <sub>2</sub> wt%                   | 0     | 0.01  | 0.03  | 0.06  | 0.10  | 0.30  | 0.60  | 1     | 3     |
|-------------------------------------------|-------|-------|-------|-------|-------|-------|-------|-------|-------|
| Specific surface area (m <sup>2</sup> /g) | 45.49 | 48.88 | 50.37 | 48.26 | 47.26 | 46.85 | 46.29 | 50.32 | 51.62 |

**Table S2** BET data for different solvent concentration.

| Solvent concentration                     | 0%    | 25%   | 50%   | 75%   | 100%  |
|-------------------------------------------|-------|-------|-------|-------|-------|
| Specific surface area (m <sup>2</sup> /g) | 44.92 | 35.80 | 46.23 | 50.18 | 48.26 |

**Table S3** XPS date of atomic (Ag@TiO<sub>2</sub>, 0.6 wt%).

| Name | Area (N) TPP-2M | Atomic % |
|------|-----------------|----------|
| Ti2p | 0.2             | 15.25    |
| O1s  | 0.58            | 43.93    |
| C1s  | 0.54            | 40.65    |
| Ag3d | 0               | 0.17     |

## 2. Equations

The reaction mechanism of Cr(VI) reduction in acidic condition was as following:

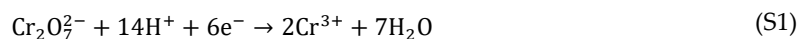

$$E^0 = 0.98 \text{ eV}$$

The reaction mechanism of Cr(VI) reduction in neutral condition was as following:

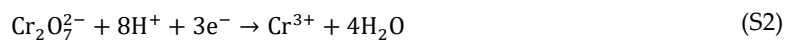

$$E^0 = 0.56 \text{ eV}$$

The reaction mechanism of Cr(VI) reduction in alkaline condition was as following:

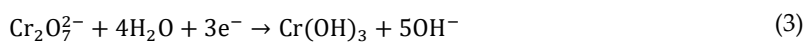

$$E^0 = 0.56 \text{ eV}$$

## 3. Figures

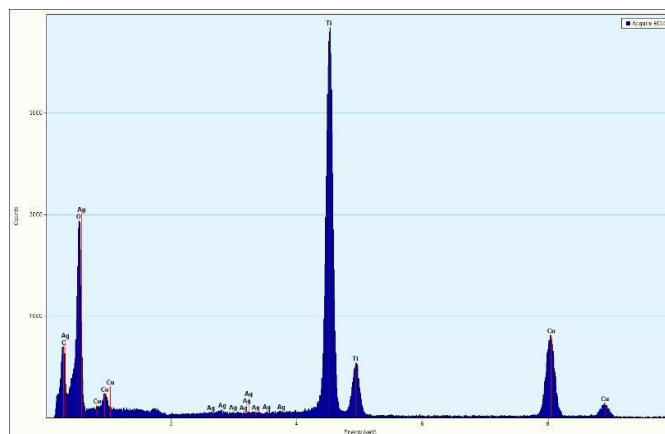

**Figure S1** The Energy Dispersive Spectrometer of Ag@TiO<sub>2</sub> catalyst.

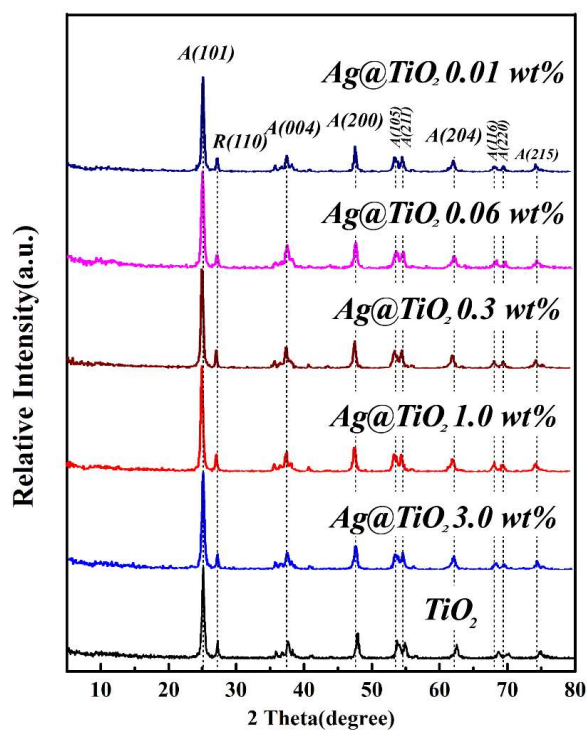

**Figure S2** XRD patterns of the Ag@TiO<sub>2</sub> nanocomposites, in which A is anatase phase and R is rutile phase.

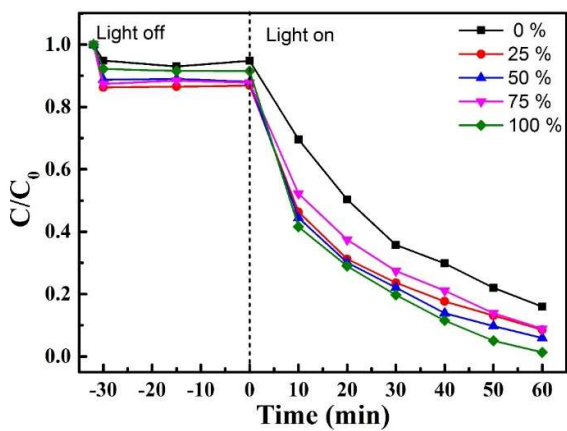

**Figure S3** Effect of different concentration of empty scavenger (Ethanol) on Cr reduction.

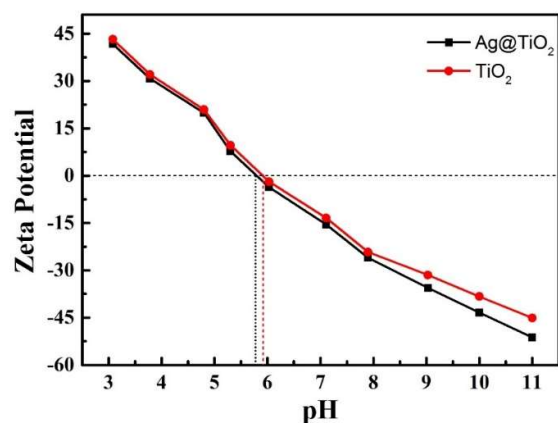Figure S4 Zeta potential of bare  $\text{TiO}_2$  and  $\text{Ag@TiO}_2$  catalyst.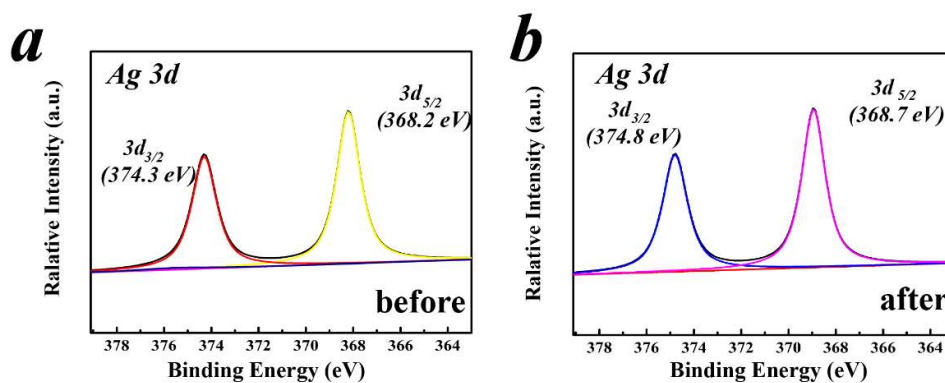Figure S5 High resolution XPS of Ag 3d of  $\text{Ag@TiO}_2$  catalyst before (a) and after (b) reaction.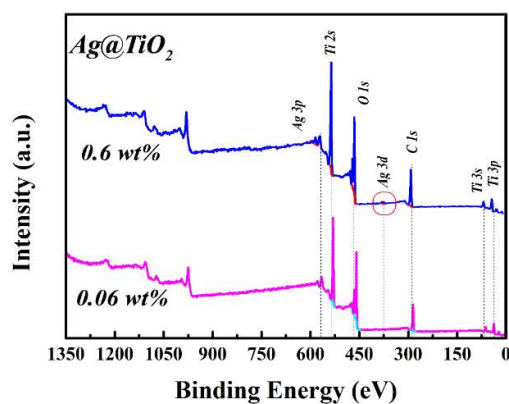Figure S6 The survey spectrum XPS spectra of the  $\text{Ag@TiO}_2$  composites.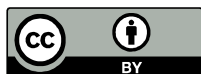

Supplement: s1 [file s1]
